# Supplementary material for: Preoperative risk stratification in endometrial cancer (ENDORISK) by a Bayesian network model: A development and validation study
Source: PubMed Central journal article supplement (PMC7228042; doi:10.1371/journal.pmed.1003111), 2020-05-15

**S1 Fig.** Study flowchart.

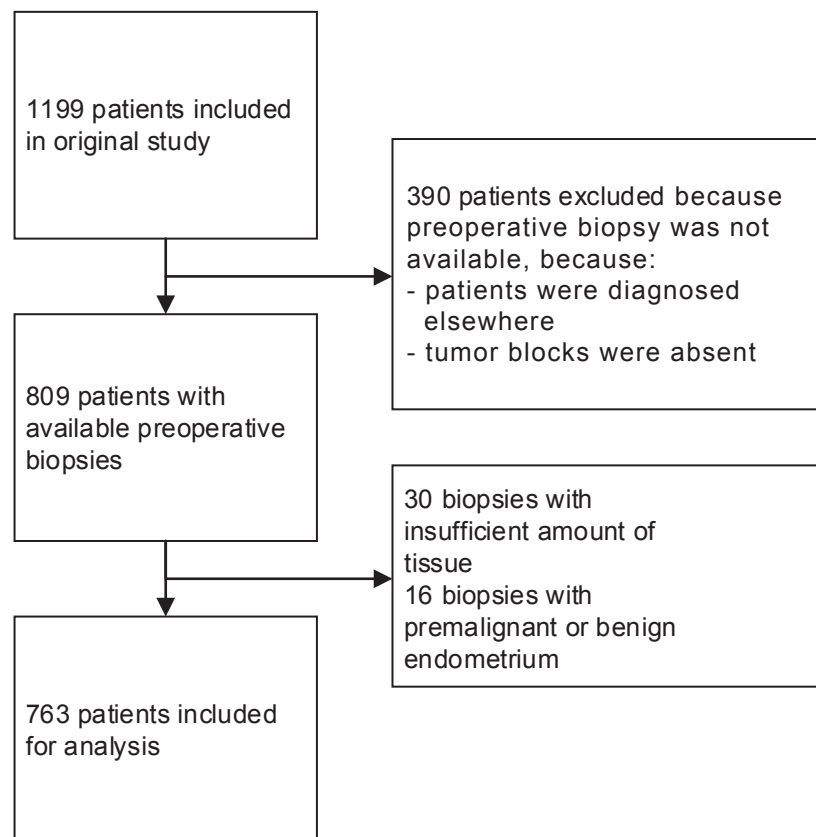

Supplement: pmed.1003111.s003.pdf [file pmed.1003111.s003.pdf]
