# Supplementary material for: Preoperative risk stratification in endometrial cancer (ENDORISK) by a Bayesian network model: A development and validation study
Source: PubMed Central journal article supplement (PMC7228042; doi:10.1371/journal.pmed.1003111), 2020-05-15
Supplement: pmed.1003111.s004.pdf [file pmed.1003111.s004.pdf]

**S2 Figure.** Decision curves for (A.) lymph node metastasis in the MoMaTEC cohort, (>). 5-year disease-specific survival in the MoMaTEC cohort, and (C). 5-year disease-specific survival in the PIPENDO cohort.

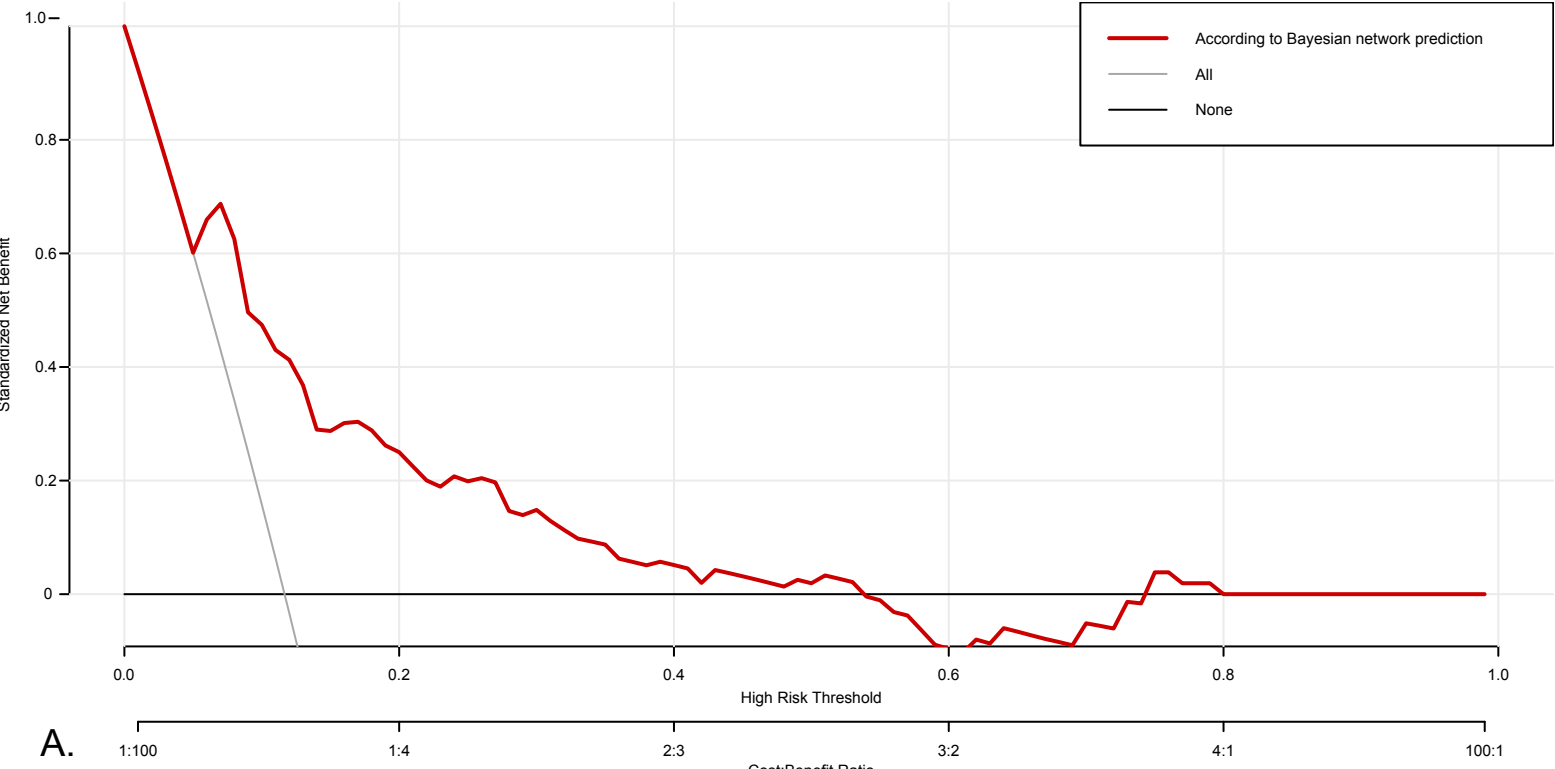

A.

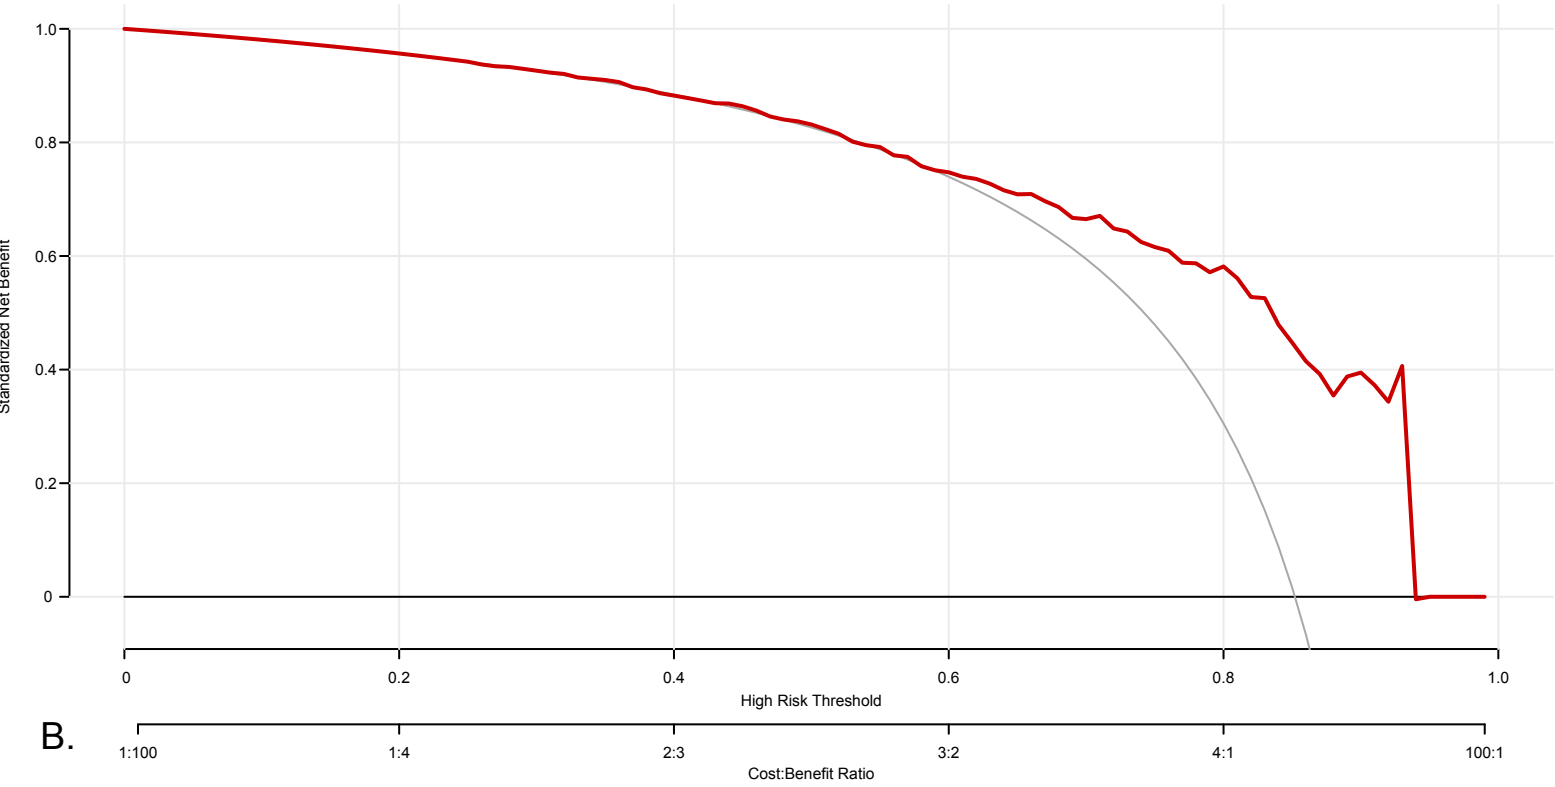

B.

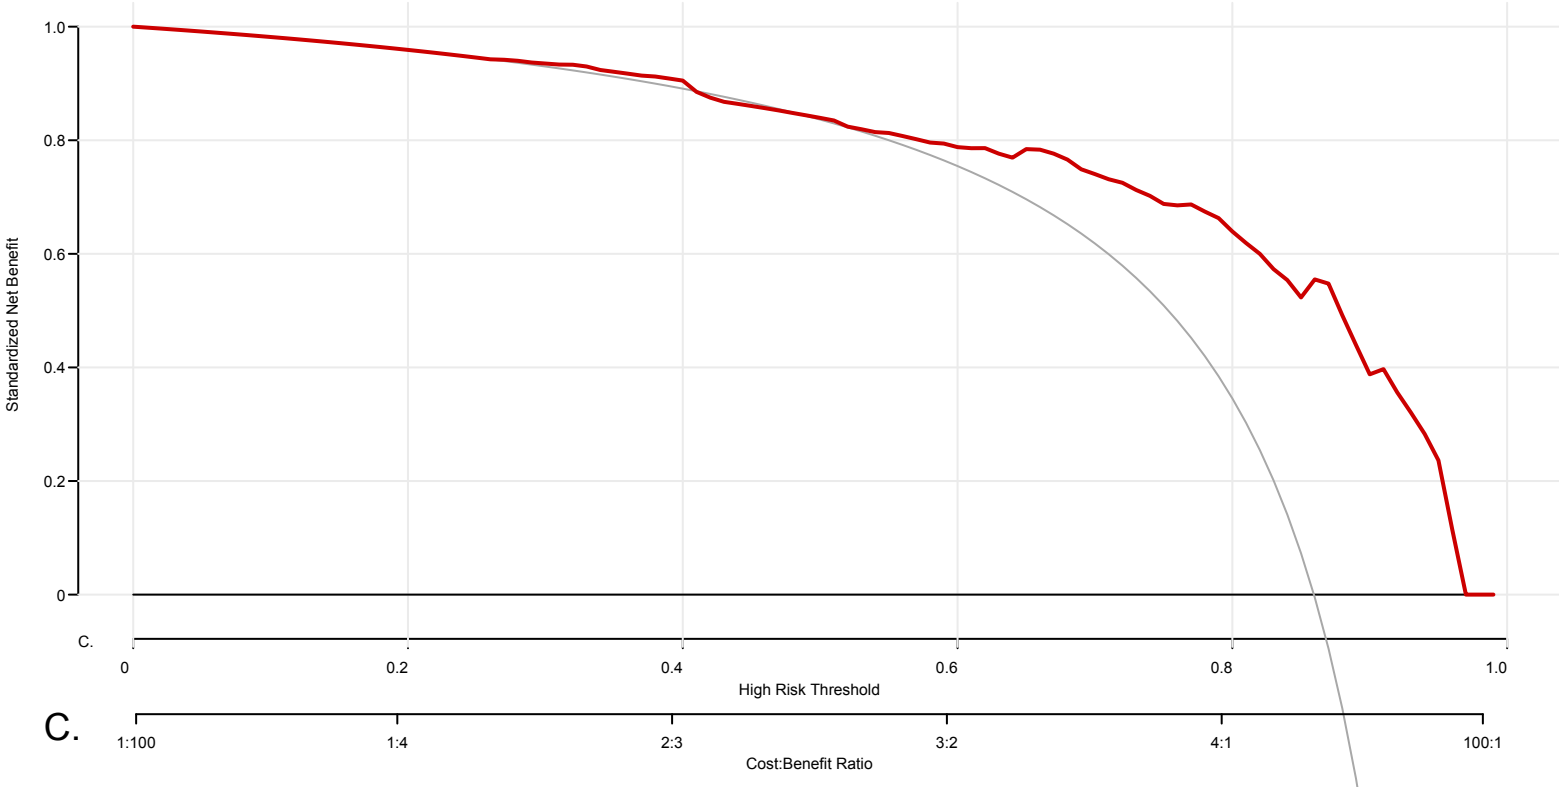

C.
