# Supplementary material for: Preoperative risk stratification in endometrial cancer (ENDORISK) by a Bayesian network model: A development and validation study
Source: PubMed Central journal article supplement (PMC7228042; doi:10.1371/journal.pmed.1003111), 2020-05-15
Supplement: pmed.1003111.s005.pdf [file pmed.1003111.s005.pdf]

**S1 Table.** Baseline characteristics of included vs. excluded patients.

| Variable             | Included patients | Excluded patients | P     |
|----------------------|-------------------|-------------------|-------|
| Age (y)              | 65 (58-71)        | 63 (55 – 70)      | 0.056 |
| Follow-up (months)   | 60 (45-74)        | 62 (54 – 86)      | 0.775 |
| Tumor grade          |                   |                   |       |
| 1                    | 317 (41.5)        | 163 (35.4)        | 0.104 |
| 2                    | 289 (37.9)        | 188 (40.8)        |       |
| 3                    | 157 (20.6)        | 110 (23.9)        |       |
| Histological subtype |                   |                   |       |
| EEC                  | 714 (93.6)        | 413 (89.6)        | 0.090 |
| NEEC                 | 49 (6.4)          | 48 (10.4)         |       |
| Myometrial invasion  |                   |                   |       |
| <50%                 | 477 (62.8)        | 278 (60.8)        | 0.507 |
| >50%                 | 283 (37.2)        | 179 (39.2)        |       |
| Unknown              | 3                 | 4                 |       |
| Cervical invasion    |                   |                   |       |
| no                   | 591 (87.3)        | 337 (80.8)        | 0.003 |
| yes                  | 86 (12.7)         | 80 (19.2)         |       |
| unknown              | 86                | 44                |       |
| FIGO stage           |                   |                   |       |
| IA                   | 428 (56.1)        | 256 (55.5)        | 0.438 |
| IB                   | 196 (25.7)        | 98 (21.3)         |       |
| II                   | 51 (6.7)          | 37 (8.0)          |       |
| IIIA                 | 20 (2.6)          | 14 (3.0)          |       |
| IIIB                 | 4 (0.5)           | 2 (0.4)           |       |
| IIIC                 | 43 (5.6)          | 39 (8.5)          |       |
| IV                   | 19 (2.5)          | 15 (3.2)          |       |
| LVSI                 |                   |                   |       |
| no                   | 435 (81.9)        | 274 (79.2)        | 0.196 |
| yes                  | 96 (18.1)         | 72 (20.8)         |       |
| unknown              | 232               | 114               |       |
| Lymph nodes          |                   |                   |       |
| negative             | 440 (89.2)        | 313 (86.5)        | 0.065 |
| positive             | 53 (10.8)         | 49 (13.5)         |       |
| unknown              | 270               | 50                |       |

Continuous variables are presented as median (with inter-quartile range).

EEC, endometrioid endometrial carcinoma; LVSI, lymphovascular space invasion; NEEC, non-endometrioid endometrial carcinoma.
