# Supplementary material for: Preoperative risk stratification in endometrial cancer (ENDORISK) by a Bayesian network model: A development and validation study
Source: PubMed Central journal article supplement (PMC7228042; doi:10.1371/journal.pmed.1003111), 2020-05-15
Supplement: pmed.1003111.s006.pdf [file pmed.1003111.s006.pdf]

**S2 Table.** Probability estimates for lymph node metastasis given different evidence situations

| Evidence provided to the Bayesian network | Lymph node metastasis (%) |
|-------------------------------------------|---------------------------|
| No evidence                               | 8.6                       |
| Preoperative grade                        |                           |
| 1                                         | 4.7                       |
| 2                                         | 8.1                       |
| 3                                         | 21.6                      |
| Preoperative grade, L1CAM                 |                           |
| 1, negative                               | 4.2                       |
| 1, positive                               | 21.6                      |
| 2, negative                               | 6.6                       |
| 2, positive                               | 28.2                      |
| 3, negative                               | 17.8                      |
| 3, positive                               | 33.0                      |
| Preoperative grade, molecular profile     |                           |
| 1, favorable*                             | 2.6                       |
| 1, unfavorable†                           | 39.5                      |
| 2, favorable                              | 4.6                       |
| 2, unfavorable                            | 39.6                      |
| 3, favorable                              | 16.1                      |
| 3, unfavorable                            | 40.0                      |
| Preoperative grade, Ca-125                |                           |
| 1, normal                                 | 1.5                       |
| 1, elevated                               | 29.3                      |
| 2, normal                                 | 2.6                       |
| 2, elevated                               | 40.3                      |
| 3, normal                                 | 7.5                       |
| 3, elevated                               | 66.8                      |

\*Favorable: all IHC stainings were normal (ER, PR positive, L1CAM negative, p53 wildtype).

†Unfavorable (ER, PR negative, L1CAM positive, p53 mutant).

Ca-125, cancer antigen 125; ER, estrogen receptor; L1CAM, L1 cell adhesion molecule; PR, progesterone receptor.
