# Supplementary material for: Preoperative risk stratification in endometrial cancer (ENDORISK) by a Bayesian network model: A development and validation study
Source: PubMed Central journal article supplement (PMC7228042; doi:10.1371/journal.pmed.1003111), 2020-05-15
Supplement: pmed.1003111.s007.pdf [file pmed.1003111.s007.pdf]

**S3 Table.** Diagnostic accuracy values for the prediction of lymph node metastasis in the MoMaTEC cohort, using various cut-off values

| MoMaTEC lymph node metastasis |             |             |      |      |                        |              |
|-------------------------------|-------------|-------------|------|------|------------------------|--------------|
| Cut-off                       | Sensitivity | Specificity | PPV  | NPV  | Predicted positive (%) | FNR          |
| 1%                            | 1.00        | 0.06        | 0.12 | 1.00 | 422 (94.6)             | 0/24 (0)     |
| 5%                            | 0.90        | 0.62        | 0.24 | 0.98 | 197 (44.2)             | 4/249 (1.6)  |
| 10%                           | 0.75        | 0.73        | 0.27 | 0.96 | 146 (32.7)             | 13/300 (4.3) |
| 15%                           | 0.65        | 0.80        | 0.30 | 0.95 | 113 (25.3)             | 18/333 (5.4) |
| 20%                           | 0.50        | 0.84        | 0.29 | 0.93 | 92 (20.6)              | 25/354 (7.1) |
| 25%                           | 0.48        | 0.89        | 0.37 | 0.93 | 70 (15.7)              | 27/376 (7.2) |

MoMaTEC, Markers for the Treatment of Endometrial Cancer; PPV, positive predictive value; NPV, negative predictive value; FNR, false negative rate.
