# Supplementary material for: Preoperative risk stratification in endometrial cancer (ENDORISK) by a Bayesian network model: A development and validation study
Source: PubMed Central journal article supplement (PMC7228042; doi:10.1371/journal.pmed.1003111), 2020-05-15
Supplement: pmed.1003111.s008.pdf [file pmed.1003111.s008.pdf]

**S4 Table.** Sensitivity analysis for external validation, omitting clinical variables and molecular markers

| Clinical and<br>histological markers | MoMaTEC            |                    | PIPENDO            |
|--------------------------------------|--------------------|--------------------|--------------------|
|                                      | LNM                | 5-year DSS         | 5-year DSS         |
| AUC (95%-CI)                         | 0.77 (0.70 – 0.85) | 0.76 (0.69 – 0.83) | 0.82 (0.76 – 0.88) |
| Brier score                          | 0.10               | 0.12               | 0.10               |
| Predicted <i>N</i> of events         | 51.6               | 411.4              | 344.7              |
| Observed <i>N</i> of events          | 52                 | 380                | 350.5              |
| Predicted/observed<br>ratio (95%-CI) | 0.99               | 1.08               | 0.98               |

  

| Molecular and<br>histological markers | MoMaTEC            |                   | PIPENDO            |
|---------------------------------------|--------------------|-------------------|--------------------|
|                                       | LNM                | 5-year DSS        | 5-year DSS         |
| AUC (95%-CI)                          | 0.66 (0.57 – 0.74) | 0.76 (0.70 -0.82) | 0.79 (0.73 – 0.86) |
| Brier score                           | 0.10               | 0.12              | 0.11               |
| Predicted <i>N</i> of events          | 43.3               | 410.9             | 350.5              |
| Observed <i>N</i> of events           | 52                 | 380               | 330                |
| Predicted/observed<br>ratio (95%-CI)  | 0.83               | 1.08              | 1.06               |
